# Supplementary material
Source: PubMed Central journal article supplement (PMC7642038)
Supplement: NIHMS1631035-supplement-Supplemental_Figures.pdf [file NIHMS1631035-supplement-Supplemental_Figures.pdf]

## Supplemental Figures

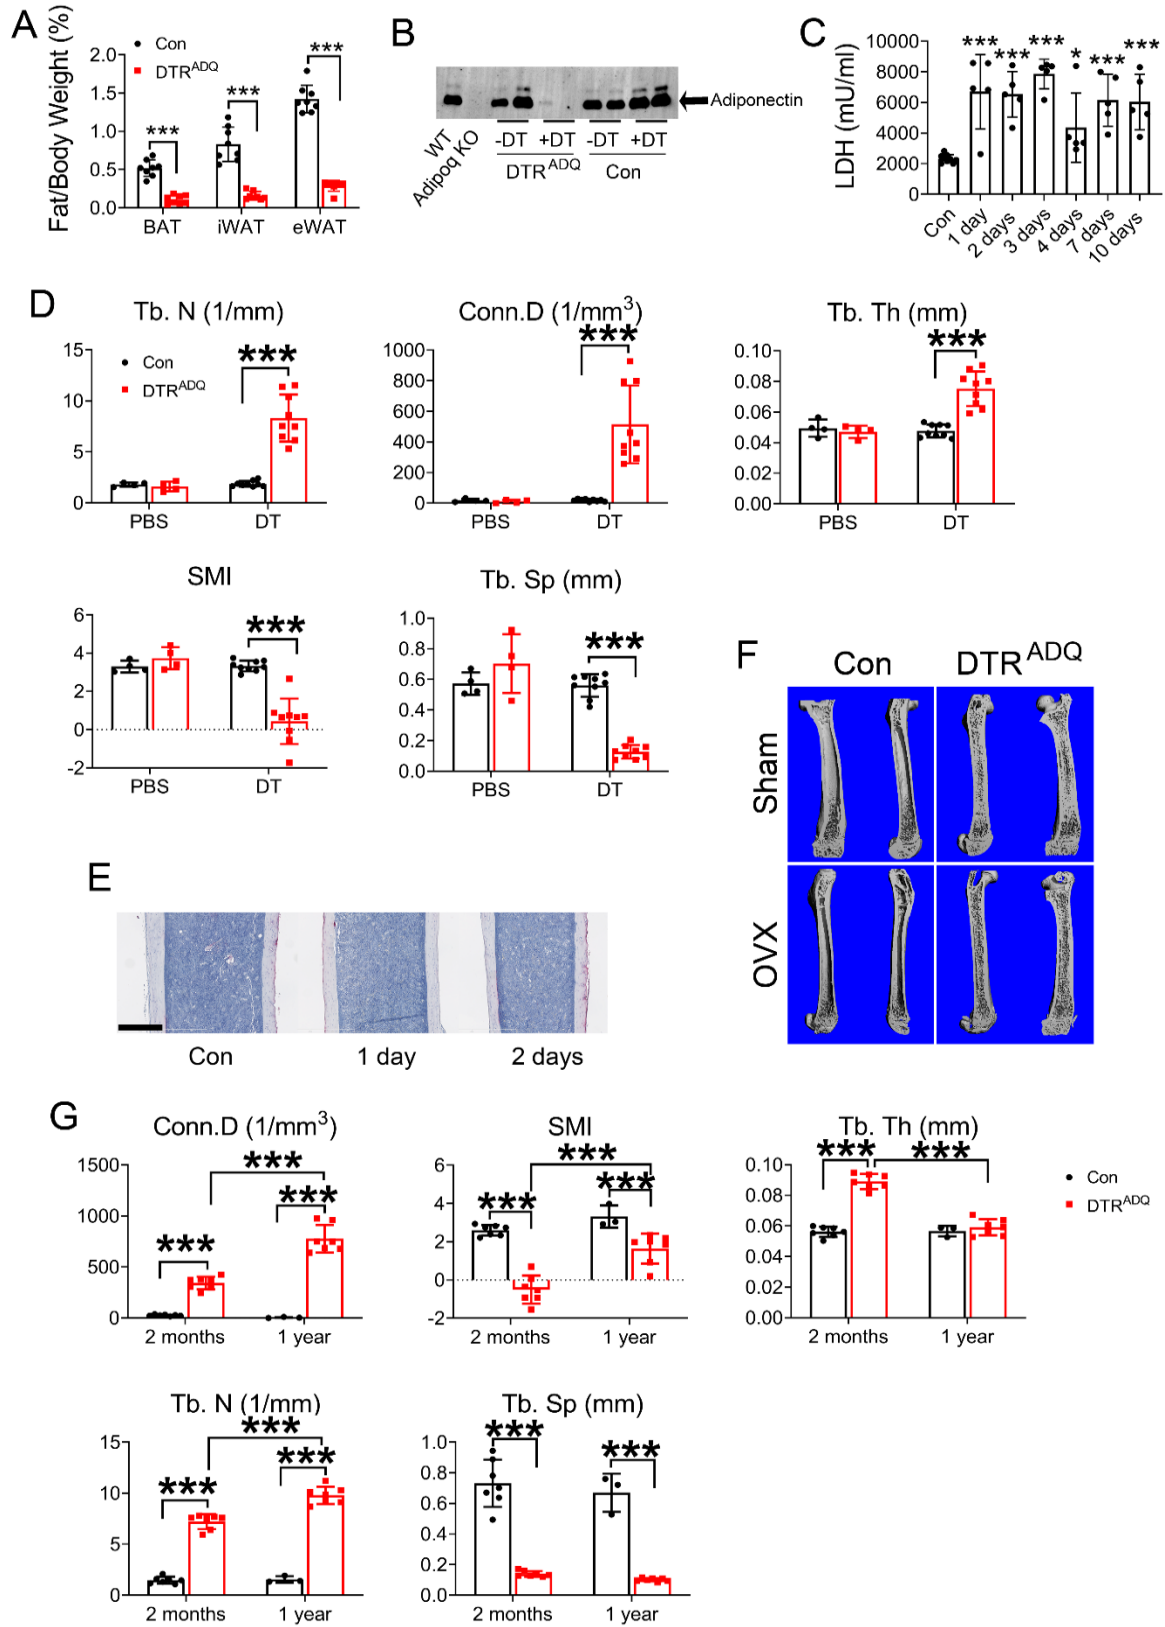

**Figure S1. Related to Fig 1. Post-natal generated fat ablated mice are osteosclerotic.**

(A) Weight of various fat depots in DTR<sup>ADQ</sup> or Con mice following 10 days of daily DT administration.  $n = 8/\text{group}$ .

(B) Serum adiponectin of DTR<sup>ADQ</sup> or Con mice following 7 days of DT (+DT) or PBS (-DT) administration. WT and adiponectin KO mice serve as respective positive and negative controls.  $n = 2$  independent experiments.

(C) Serum LDH level of DTR<sup>ADQ</sup> mice following DT administration as indicated time. WT mice with 3 days of DT administration serve as control (Con).  $n = 5-9/\text{group}$ .

(D)  $\mu\text{CT}$  quantitation of structural model index (SMI), trabecular number (Tb.N), trabecular thickness (Tb.Th), trabecular spacing (Tb.Sp) and connection density (Conn.D) of 2 month old DTR<sup>ADQ</sup> and Con mice following 10 days of DT administration.  $n = 4-9/\text{group}$ .

(E) Representative histological image of femoral diaphysis of DTR<sup>ADQ</sup> mice following DT administration with time. NO DT treatment serves as control.  $n = 3/\text{group}$ . Scale bar: 400  $\mu\text{m}$ .

(F) Representative  $\mu\text{CT}$  image of femurs of DTR<sup>ADQ</sup> and Con mice treated with DT for 10 days 3 weeks after ovariectomy or sham operation.  $n = 2-6/\text{group}$ .

(G)  $\mu\text{CT}$  quantitation of structural model index (SMI), trabecular number (Tb.N), trabecular thickness (Tb.Th), trabecular spacing (Tb.Sp) and connection density (Conn.D) of 2 month and 1 year old DTR<sup>ADQ</sup> and Con mice following 10 days of DT administration.  $n = 3-7/\text{group}$ .

Data are presented as mean  $\pm$  SD. \*  $P < 0.05$ , \*\*\*  $P < 0.001$  as determined by 1way (c) or 2 way (A, D, G) ANOVA with Holm-Sidak's post hoc analysis for multiple comparisons test.

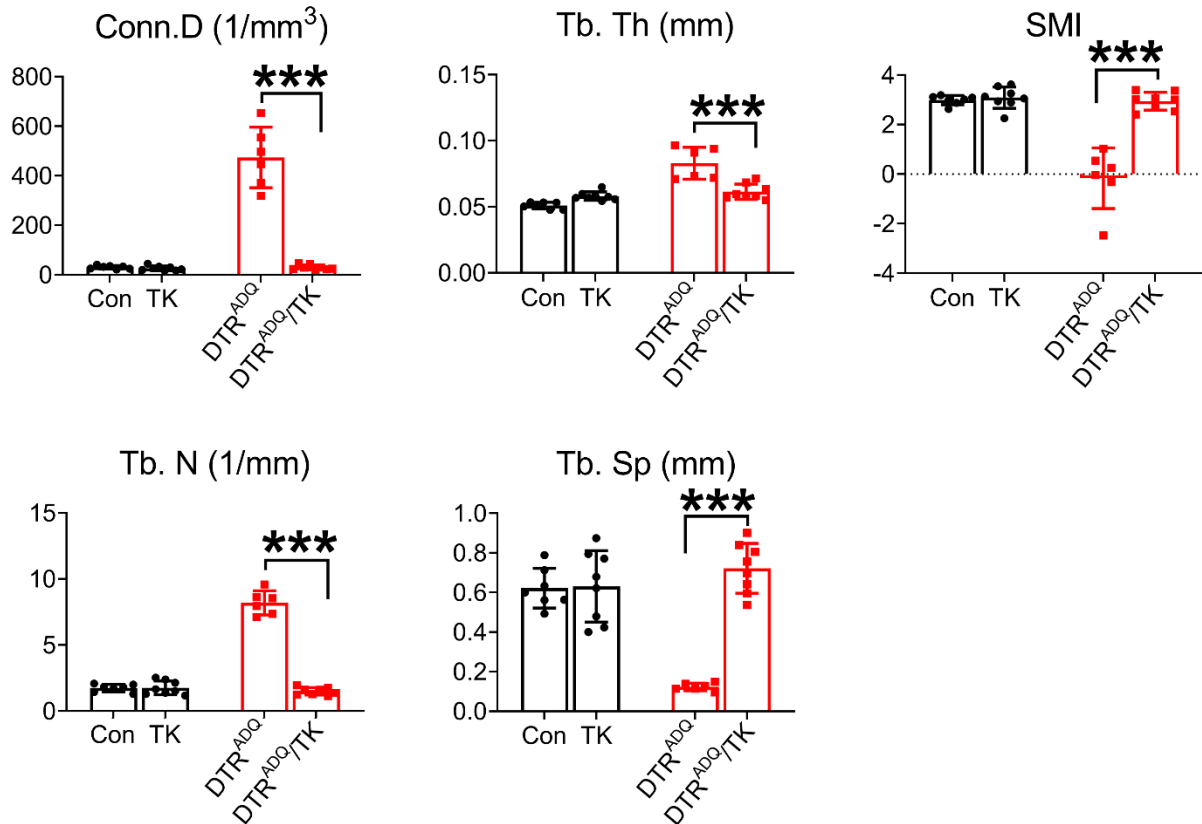

**Figure S2. Related to Fig 3. DT/DTR<sup>ADQ</sup> osteosclerosis is due to enhanced osteoblast recruitment and differentiation.**

Con or DTR<sup>ADQ</sup> mice were mated with Col1a1\*3.6 -TK mice (TK). At 2 months of age all 4 genotypes were treated with DT and Ganciclovir for 10 days.  $\mu$ CT quantitation of structural model index (SMI), trabecular number (Tb.N), trabecular thickness (Tb.Th), trabecular spacing (Tb.Sp) and connection density (Conn.D).  $n = 6-8$ /group.

Data are presented as mean  $\pm$  SD. \*\*\*  $P < 0.001$  as determined by 2 way ANOVA with Holm-Sidak's post hoc analysis for multiple comparisons test.

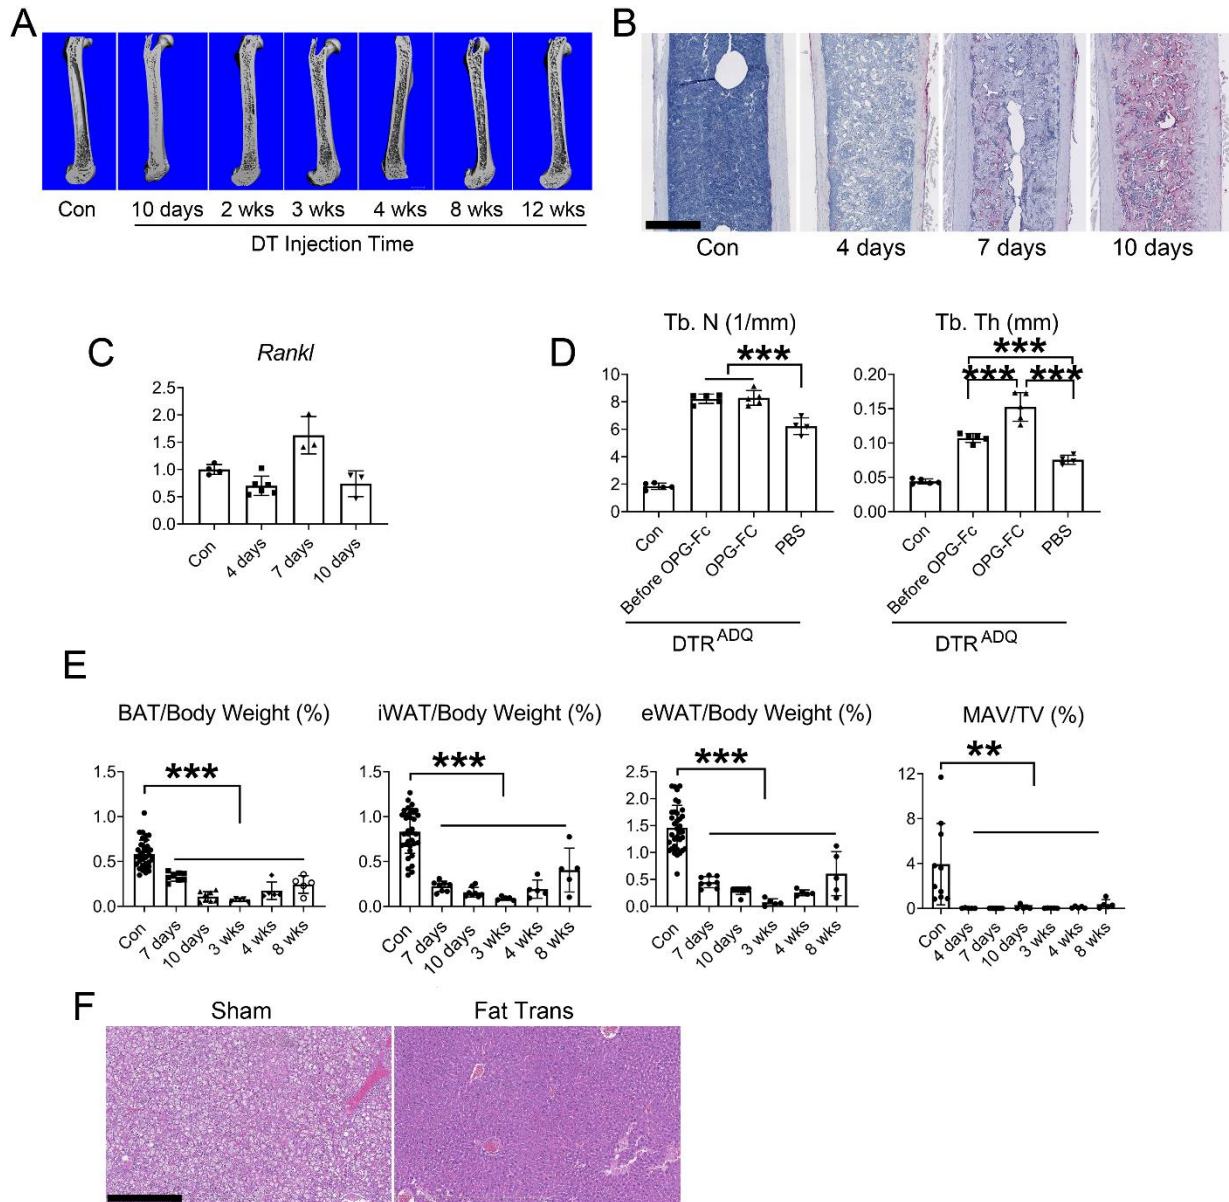

**Figure S3. Related to Fig 4. Anti-resorptive therapy maintains DT/DTRADQ osteosclerosis.**

(A) Representative  $\mu$ CT images of femur of Con and DTR<sup>ADQ</sup> mice administered DT daily with time.  $n = 3-8$ /group.

(B) Histological images of femoral diaphysis of DTR<sup>ADQ</sup> mice administered with DT daily for 4, 7 or 10 days. No DT treatment as control.  $n = 3-4$ /group. Scale bar: 500  $\mu$ m.

(C) qPCR analysis of femoral bone Rankl mRNA of 2month old DTR<sup>ADQ</sup> mice treated with DT with time. No DT treatment serves as control.  $n = 3-6$ /group.

(D)  $\mu$ CT quantitation of trabecular number (Tb.N), and trabecular thickness (Tb.Th) of Con or DTR<sup>ADQ</sup> mice treated with DT for 10 days (Con and Before OPG-Fc), or DTR<sup>ADQ</sup> mice after continued DT treatment, with or without (PBS) OPG-Fc, for an additional 20 days.  $n = 4-5$ /group.

(E) Weight of various fat depots in DTR<sup>ADQ</sup> mice following indicated days of DT administration (left 3 panels),  $n = 5-35/\text{group}$ ; right panel: femur marrow adipocytes of DTR<sup>ATQ</sup> mice were stained with osmium after indicated time with DT. Marrow adipocytes volume per total volume (MAV/TV) was analyzed in osmium tetroxide stained femurs by  $\mu\text{CT}$ . No DT treatment serves as control.  $n = 5-10/\text{group}$ .

(F) Histological images of liver of DTR<sup>ADQ</sup> mice treated with DT for 10 days 2 months after WAT transplantation or sham surgery.  $n = 3/\text{group}$ . Scale bar:  $400\mu\text{m}$ .

Data are presented as mean  $\pm$  SD. \*\*  $P < 0.01$  and \*\*\*  $P < 0.001$  as determined by 1 way ANOVA with Holm-Sidak's post hoc analysis for multiple comparisons test.

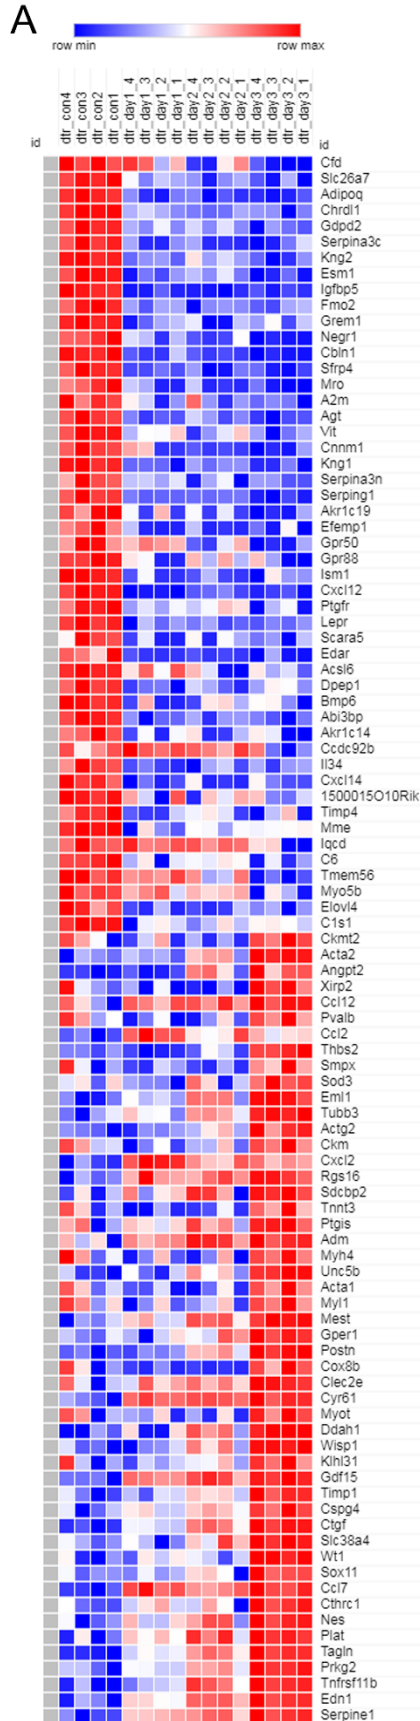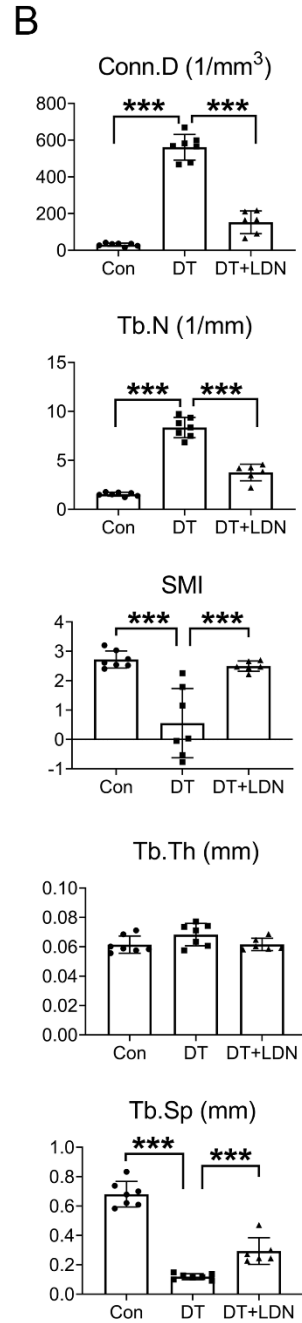

**Figure S4. Related to Fig 6. BMPR signaling mediates adipocyte ablation-induced osteosclerosis.**

(A) Heatmap of RNA sequencing of bone marrow mRNAs of DTR<sup>ADQ</sup> mice treated with or without (Con) DT with time. Top 50 downregulated and upregulated genes are listed according to the Log FC value.

(B)  $\mu$ CT quantitation of structural model index (SMI), trabecular number (Tb.N), trabecular thickness (Tb.Th), trabecular spacing (Tb.Sp) and connection density (Conn.D) of 2 month old DTR<sup>ADQ</sup> mice treated with DT in the presence or absence of LDN193189 for 10 days. No DT treatment serves as control.  $n = 6-7$ /group.

Data are presented as mean  $\pm$  SD. \*\*\*  $P < 0.001$  as determined by 1 way ANOVA with Holm-Sidak's post hoc analysis for multiple comparisons test.

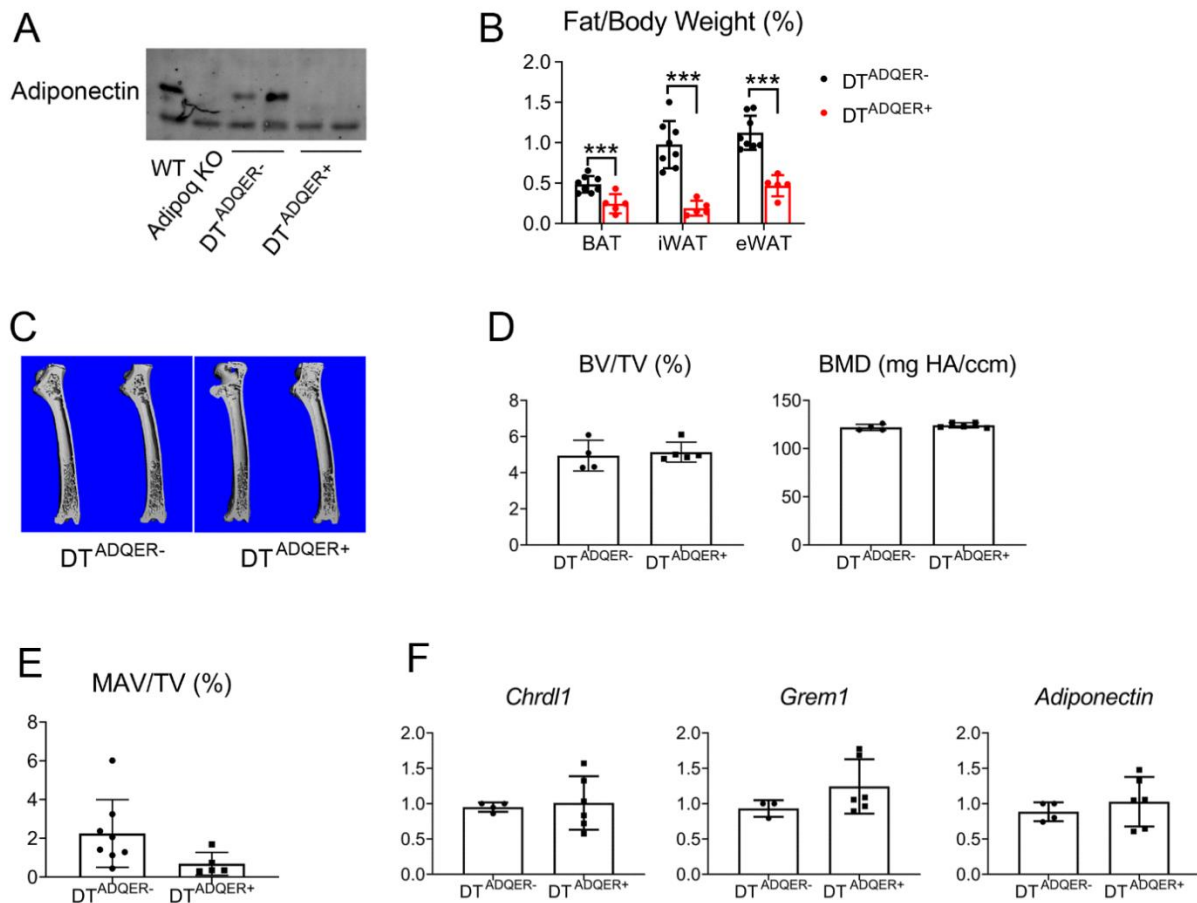

**Figure S5. Related to Fig 6. Loss of marrow adipocytes is required for the promotion of osteogenesis.**

(A - F) 2 – 3 months old Con and DT<sup>ADQER</sup> mice were injected IP with Tamoxifen for 5 consecutive days. After 2 weeks,

(A) Serum adiponectin was assessed by immunoblot. Adiponectin<sup>-/-</sup> mice serve as negative control.  $n = 2$  independent experiments.

(B) Weight of various fat depots in Con (DT<sup>ADQER</sup>-) and DT<sup>ADQER</sup> mice.  $n = 5-8$ /group.

(C) Representative  $\mu$ CT images of femurs of DT<sup>ADQER</sup> and Cre- control mice.  $n = 4-5$ /group.

(D) Quantitative  $\mu$ CT analysis of whole femur of DT<sup>ADQER</sup> and Cre- control mice.  $n = 4-5$ /group.

(E) Femur marrow adipocytes were stained with osmium. Marrow adipocytes volume per total volume (MAV/TV) was analyzed by  $\mu$ CT.  $n = 5-8$ /group.

(F) qPCR analysis of *Chrdl1*, *Grem1*, *Adiponectin* femoral marrow mRNA of 2 month old DT<sup>ADQER</sup> and Cre- control mice 2 weeks after Tamoxifen injection.  $n = 4-6$ /group.

Data are presented as mean  $\pm$  SD. \*\*\*  $P < 0.001$  as determined by 1 way ANOVA with Holm-Sidak's post hoc analysis for multiple comparisons test (B).



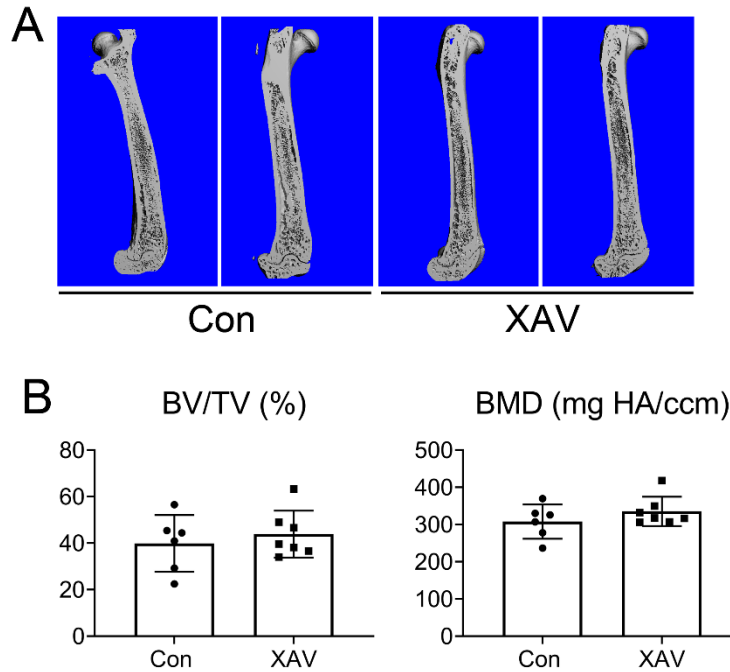

**Figure S6. Related to Fig 6. Wnt signaling does not mediate adipocyte ablation-induced osteosclerosis.**

(A) Representative  $\mu$ CT images of femur of DTR<sup>ADQ</sup> mice administered DT daily, for 10 days, in the presence or absence of XAV-939 (10mg/Kg/day).  $n = 6-7$ /group.

(B)  $\mu$ CT quantitation of BV/TV and BMD of (A).  $n = 6-7$ /group.

Data are presented as mean  $\pm$  SD.

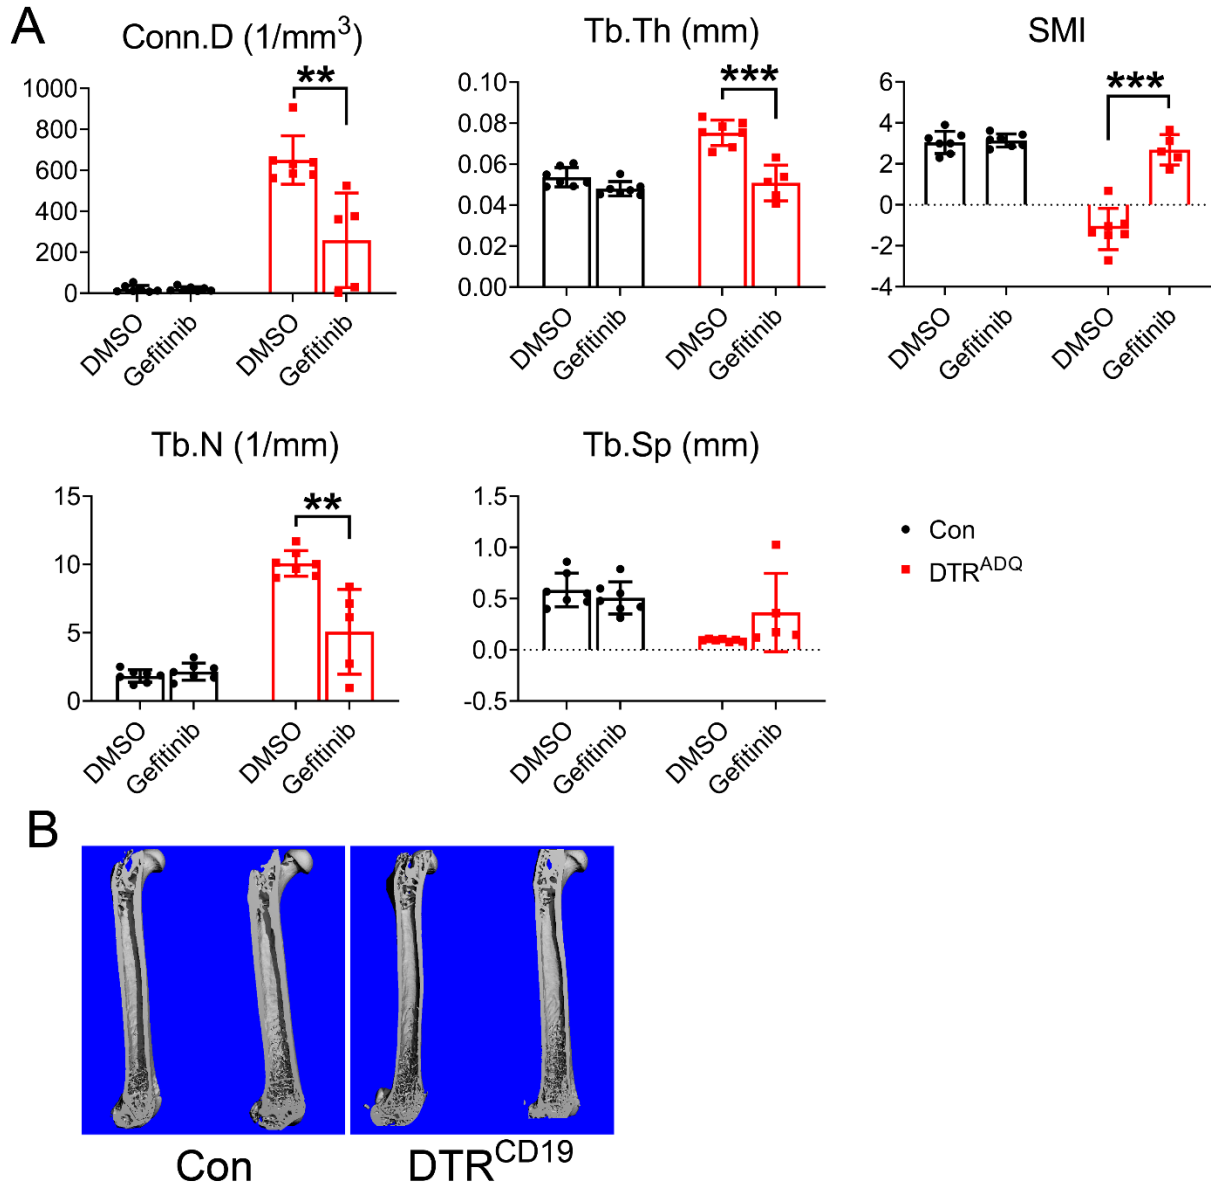

**Figure S7. Related to Fig 7. EGFR and BMPR signaling partner to promote osteosclerosis.**

(A) Whole femur  $\mu$ CT quantitation of structural model index (SMI), trabecular number (Tb.N), trabecular thickness (Tb.Th), trabecular spacing (Tb.Sp) and connection density (Conn.D) of Con or DTR<sup>ADQ</sup> mice treated with DT in the presence or absence of Gefitinib (100mg/Kg) daily for 10 days.  $n = 5-7/\text{group}$ .

(B) Representative  $\mu$ CT images of femur of DTR<sup>CD19</sup> and their Cre- littermate mice following 10 days of DT administration.  $n = 6-9/\text{group}$ .

Data are presented as mean  $\pm$  SD. \*\*  $P < 0.01$ , \*\*\*  $P < 0.001$  as determined by 2 way ANOVA with Holm-Sidak's post hoc analysis for multiple comparisons test.
